# Supplementary material for: Sex Differences in Cancer Incidence Rates by Race and Ethnicity: Results from the Surveillance, Epidemiology, and End Results (SEER) Registry (2000–2019)
Source: MDPI journal article supplement (doi:10.3390/cancers16050989), 2024-02-29
Supplement: s1 [file s1]

**Table S1.** *ICD-O-3* codes and SEER recodes of cancer sites and selected histological subtypes.

| <b>Cancer Sites</b>                                                                                                                                                                                                                                                   | <b><i>ICD-O-3</i> Site</b>                            | <b><i>ICD-O-3</i> Histology (Type)</b>                                                            |
|-----------------------------------------------------------------------------------------------------------------------------------------------------------------------------------------------------------------------------------------------------------------------|-------------------------------------------------------|---------------------------------------------------------------------------------------------------|
| <b>Lip</b>                                                                                                                                                                                                                                                            | C000-C009                                             |                                                                                                   |
| <b>Tongue</b>                                                                                                                                                                                                                                                         | C019-C029                                             |                                                                                                   |
| <b>Salivary Gland</b>                                                                                                                                                                                                                                                 | C079-C089                                             |                                                                                                   |
| <b>Floor of Mouth</b>                                                                                                                                                                                                                                                 | C040-C049                                             |                                                                                                   |
| <b>Gum and Other Mouth</b>                                                                                                                                                                                                                                            | C030-C039, C050-C059,<br>C060-C069                    |                                                                                                   |
| <b>Nasopharynx</b>                                                                                                                                                                                                                                                    | C110-C119                                             |                                                                                                   |
| <b>Tonsil</b>                                                                                                                                                                                                                                                         | C090-C099                                             |                                                                                                   |
| <b>Oropharynx</b>                                                                                                                                                                                                                                                     | C100-C109                                             |                                                                                                   |
| <b>Hypopharynx</b>                                                                                                                                                                                                                                                    | C129, C130-C139                                       |                                                                                                   |
| <b>Other Oral Cavity and Pharynx</b>                                                                                                                                                                                                                                  | C140, C142, C148                                      |                                                                                                   |
| <b>Esophagus</b>                                                                                                                                                                                                                                                      | C150-C159                                             |                                                                                                   |
| <b>Stomach</b>                                                                                                                                                                                                                                                        | C160-C169                                             |                                                                                                   |
| <b>Small Intestine</b>                                                                                                                                                                                                                                                | C170-C179                                             |                                                                                                   |
| <b>Colon and Rectum<br/>(Including Cecum, Appendix, Ascending<br/>Colon, Hepatic Flexure, Transverse<br/>Colon, Splenic Flexure, Descending<br/>Colon, Sigmoid Colon, Large Intestine,<br/>Rectosigmoid Junction, and Rectum)<br/>Anus, Anal Canal, and Anorectum</b> | C180-C189, C199, C209,<br>C260<br><br>C210-C212, C218 | <br><br><br>excluding 9050-9055, 9140, 9590-<br>9993                                              |
| <b>Liver</b>                                                                                                                                                                                                                                                          | C220                                                  |                                                                                                   |
| <b>Gallbladder</b>                                                                                                                                                                                                                                                    | C239                                                  |                                                                                                   |
| <b>Other Biliary</b>                                                                                                                                                                                                                                                  | C240-C249                                             |                                                                                                   |
| <b>Pancreas</b>                                                                                                                                                                                                                                                       | C250-C259                                             |                                                                                                   |
| <b>Retroperitoneum</b>                                                                                                                                                                                                                                                | C480                                                  |                                                                                                   |
| <b>Peritoneum, Omentum, and Mesentery</b>                                                                                                                                                                                                                             | C481-C482                                             |                                                                                                   |
| <b>Other Digestive Organs</b>                                                                                                                                                                                                                                         | C268-C269, C488                                       |                                                                                                   |
| <b>Nose, Nasal Cavity, and Middle Ear</b>                                                                                                                                                                                                                             | C300-C301, C310-C319                                  |                                                                                                   |
| <b>Larynx</b>                                                                                                                                                                                                                                                         | C320-C329                                             |                                                                                                   |
| <b>Lung and Bronchus</b>                                                                                                                                                                                                                                              | C340-C349                                             |                                                                                                   |
| <b>Pleura</b>                                                                                                                                                                                                                                                         | C384                                                  |                                                                                                   |
| <b>Trachea, Mediastinum, and Other<br/>Respiratory Organs</b>                                                                                                                                                                                                         | C339, C381-C383, C388,<br>C390, C398, C399            |                                                                                                   |
| <b>Bones and Joints</b>                                                                                                                                                                                                                                               | C400-C419                                             |                                                                                                   |
| <b>Soft Tissue Including Heart</b>                                                                                                                                                                                                                                    | C380, C470-C479, C490-<br>C499                        |                                                                                                   |
| <b>Skin Excluding Basal and Squamous</b>                                                                                                                                                                                                                              | C440-C449                                             | excluding 8000-8005, 8010-8046,<br>8050-8084, 8090-8110, 8720-8790,<br>9050-9055, 9140, 9590-9993 |

|                                                                                                                                                                                        |                                                            |                                                                                                                                                                                                          |
|----------------------------------------------------------------------------------------------------------------------------------------------------------------------------------------|------------------------------------------------------------|----------------------------------------------------------------------------------------------------------------------------------------------------------------------------------------------------------|
| <b>Melanoma of the Skin</b>                                                                                                                                                            | C440-C449                                                  | 8720-8790                                                                                                                                                                                                |
| <b>Other Non-Epithelial Skin</b>                                                                                                                                                       | C440-C449                                                  | excluding 8000-8005, 8010-8046,<br>8050-8084, 8090-8110, 8720-8790,<br>9050-9055, 9140, 9590-9993                                                                                                        |
| <b>Urinary Bladder</b>                                                                                                                                                                 | C670-C679                                                  |                                                                                                                                                                                                          |
| <b>Kidney and Renal Pelvis</b>                                                                                                                                                         | C649, C659                                                 |                                                                                                                                                                                                          |
| <b>Ureter</b>                                                                                                                                                                          | C669                                                       |                                                                                                                                                                                                          |
| <b>Other Urinary Organs</b>                                                                                                                                                            | C680-C689                                                  |                                                                                                                                                                                                          |
| <b>Eye and Orbit</b>                                                                                                                                                                   | C690-C699                                                  | excluding 9050-9055, 9140, 9590-<br>9993                                                                                                                                                                 |
| <b>Brain</b>                                                                                                                                                                           | C710-C719                                                  |                                                                                                                                                                                                          |
| <b>Cranial Nerves Other Nervous System</b>                                                                                                                                             | C700-C729                                                  |                                                                                                                                                                                                          |
| <b>Thyroid</b>                                                                                                                                                                         | C739                                                       |                                                                                                                                                                                                          |
| <b>Other Endocrine Including Thymus</b>                                                                                                                                                | C379, C740-C749, C750-<br>C759                             |                                                                                                                                                                                                          |
| <b>Hodgkin Lymphoma<br/>(Including Nodal and Extranodal<br/>Hodgkin Lymphoma)</b>                                                                                                      | C024, C098-C099, C111,<br>C142, C379, C422, C770-<br>C779  | 9650-9667                                                                                                                                                                                                |
| <b>Non-Hodgkin Lymphoma<br/>(Including Nodal and Extranodal Non-<br/>Hodgkin Lymphoma)</b>                                                                                             | C024, C098, C099, C111,<br>C142, C379, C422, C770-<br>C779 | 9590-9597, 9670-9671, 9673, 9675,<br>9678-9680, 9684, 9687-9691, 9695,<br>9698-9702, 9705, 9708-9709, 9712,<br>9714-9719, 9724-9729, 9735, 9737-<br>9738, 9811-9818, 9823, 9827, 9837<br>9731-9732, 9734 |
| <b>Myeloma</b>                                                                                                                                                                         |                                                            |                                                                                                                                                                                                          |
| <b>Lymphocytic Leukemia<br/>(Including Acute, Chronic, and Other<br/>Lymphocytic Leukemia)</b>                                                                                         | C420, C421, C424                                           | 9811-9819, 9820, 9823, 9826, 9832-<br>9837, 9940                                                                                                                                                         |
| <b>Myeloid and Monocytic Leukemia<br/>(Including Acute Myeloid Leukemia,<br/>Acute Monocytic Leukemia, Chronic<br/>Myeloid Leukemia, and Other Myeloid<br/>and Monocytic Leukemia)</b> |                                                            | 9840, 9860-9861, 9863, 9865-9867,<br>9869, 9871-9879, 9891, 9895-9897,<br>9898, 9910-9912, 9920, 9930, 9945-<br>9946,                                                                                    |
| <b>Other Leukemia<br/>(Including Other Acute Leukemia,<br/>Aleukemic, Subleukemic, and NOS)</b>                                                                                        |                                                            | 9733, 9742, 9800-9801, 9805-9809,<br>9827, 9870, 9931, 9948, 9963-9964                                                                                                                                   |
| <b>Mesothelioma</b>                                                                                                                                                                    |                                                            | 9050-9055                                                                                                                                                                                                |
| <b>Kaposi Sarcoma</b>                                                                                                                                                                  |                                                            | 9140                                                                                                                                                                                                     |
| <i>Cancer site and histology type</i>                                                                                                                                                  |                                                            |                                                                                                                                                                                                          |
| <b>Esophagus Adenocarcinoma</b>                                                                                                                                                        | C150-C159                                                  | 8140-8231, 8250-8551, 8570-8574,<br>8576                                                                                                                                                                 |
| <b>Esophagus SCC</b>                                                                                                                                                                   | C150-C159                                                  | 8050-8078, 8083-8084                                                                                                                                                                                     |
| <b>Gastric Cardia Adenocarcinoma</b>                                                                                                                                                   | C160                                                       | 8140-8231, 8250-8551, 8570-8574,<br>8576                                                                                                                                                                 |
| <b>Gastric Non-Cardia Adenocarcinoma</b>                                                                                                                                               | C161-C169                                                  | 8140-8231, 8250-8551, 8570-8574,<br>8576                                                                                                                                                                 |
| <b>Liver HCC</b>                                                                                                                                                                       | C220                                                       | 8170-8175                                                                                                                                                                                                |
| <b>Liver ICC</b>                                                                                                                                                                       | C220                                                       | 8160/3                                                                                                                                                                                                   |

|                                               |           |                                          |
|-----------------------------------------------|-----------|------------------------------------------|
| <b>Lung and Bronchus Adenocarcinoma</b>       | C340-C349 | 8140-8231, 8250-8551, 8570-8574,<br>8576 |
| <b>Lung and Bronchus SCC</b>                  | C340-C349 | 8002, 8040-8045, 8240, 8246              |
| <b>Lung and Bronchus Small Cell Carcinoma</b> | C340-C349 | 8002, 8040-8045, 8240, 8246              |
| <b>Lung and Bronchus Large Cell Carcinoma</b> | C340-C349 | 8012                                     |
| <b>Urinary Bladder TCC</b>                    | C670-C679 | 8120-8131                                |

Abbreviations: *ICD-O-3*, *International Classification of Diseases for Oncology*, 3<sup>rd</sup> Edition; WHO, World Health Organization; NOS, not otherwise specified; SCC, squamous cell carcinoma; HCC, hepatocellular carcinoma; ICC, intrahepatic cholangiocarcinoma; TCC, transitional cell carcinoma.

**Table S2.** Male and female incidence rates per 100,000 by racial and ethnic group, SEER 2000-2019.

|                                            | Non-Hispanic White |                | Non-Hispanic Black |                | Non-Hispanic Asian<br>Pacific Islander |                | Latino       |                | Non-Hispanic<br>American<br>Indian/Alaskan<br>Native |                |
|--------------------------------------------|--------------------|----------------|--------------------|----------------|----------------------------------------|----------------|--------------|----------------|------------------------------------------------------|----------------|
|                                            | Male<br>rate       | Female<br>rate | Male<br>rate       | Female<br>rate | Male<br>rate                           | Female<br>rate | Male<br>rate | Female<br>rate | Male<br>rate                                         | Female<br>rate |
| <b>Lip</b>                                 | 2.6                | 0.7            | 0.2                | 0.1            | 0.2                                    | 0.1            | 1.0          | 0.2            | 1.3                                                  | 0.3            |
| <b>Tongue</b>                              | 7.5                | 2.8            | 5.1                | 1.6            | 3.6                                    | 2.1            | 3.4          | 1.6            | 4.0                                                  | 1.6            |
| <b>Salivary Gland</b>                      | 2.5                | 1.4            | 1.7                | 1.4            | 1.5                                    | 1.4            | 1.5          | 1.1            | 1.7                                                  | 1.5            |
| <b>Floor of Mouth</b>                      | 1.4                | 0.6            | 1.5                | 0.5            | 0.4                                    | 0.2            | 0.8          | 0.3            | 1.5                                                  | 0.6            |
| <b>Gum and Other Mouth</b>                 | 2.7                | 2.0            | 2.8                | 1.7            | 2.1                                    | 1.3            | 1.7          | 1.2            | 2.5                                                  | 1.4            |
| <b>Nasopharynx</b>                         | 0.7                | 0.3            | 1.4                | 0.5            | 6                                      | 2.1            | 0.7          | 0.3            | 4.8                                                  | 2.0            |
| <b>Tonsil</b>                              | 4.4                | 1.0            | 4.3                | 0.9            | 1.5                                    | 0.3            | 2.5          | 0.5            | 2.6                                                  | 0.5            |
| <b>Oropharynx</b>                          | 0.9                | 0.3            | 1.5                | 0.4            | 0.3                                    | 0.1            | 0.6          | 0.1            | 0.8                                                  | 0.2            |
| <b>Hypopharynx</b>                         | 1.5                | 0.4            | 2.5                | 0.5            | 1.3                                    | 0.2            | 1.3          | 0.2            | 2.6                                                  | 0.4            |
| <b>Other Oral Cavity and<br/>Pharynx</b>   | 0.5                | 0.2            | 0.7                | 0.2            | 0.2                                    | 0.0            | 0.3          | 0.1            | 0.6                                                  | 0.2            |
| <b>Esophagus</b>                           | 10.9               | 2.7            | 11.1               | 3.9            | 6.1                                    | 1.4            | 7.3          | 1.5            | 10.8                                                 | 3.5            |
| <b>Stomach</b>                             | 12.1               | 5.4            | 22.4               | 11.8           | 24.5                                   | 13.7           | 21.3         | 13.1           | 28.4                                                 | 14.8           |
| <b>Small Intestine</b>                     | 3.5                | 2.4            | 5.5                | 4.2            | 2.1                                    | 1.3            | 2.6          | 1.9            | 2.7                                                  | 1.9            |
| <b>Colon and Rectum</b>                    | 72.7               | 55.5           | 86.7               | 66.9           | 67.1                                   | 47.0           | 61.1         | 43.4           | 86.8                                                 | 71.0           |
| <b>Anus, Anal Canal, and<br/>Anorectum</b> | 2.2                | 3.0            | 3.5                | 2.3            | 0.7                                    | 0.7            | 1.4          | 1.9            | 1.8                                                  | 2.1            |
| <b>Liver</b>                               | 11.5               | 4.1            | 21.9               | 6.8            | 30                                     | 11.0           | 25.4         | 9.8            | 28.1                                                 | 14.3           |
| <b>Gallbladder</b>                         | 0.9                | 1.6            | 1.5                | 2.4            | 1.6                                    | 2.0            | 1.8          | 4.5            | 4.7                                                  | 6.7            |
| <b>Other Biliary</b>                       | 2.7                | 1.8            | 2.8                | 2.0            | 4.2                                    | 2.6            | 4.0          | 3.1            | 4.8                                                  | 4.2            |
| <b>Pancreas</b>                            | 19.1               | 14.5           | 23.8               | 20.4           | 16.1                                   | 12.9           | 16.4         | 14.3           | 20.8                                                 | 15.7           |

|                                                                   |      |      |       |      |      |      |      |      |      |      |
|-------------------------------------------------------------------|------|------|-------|------|------|------|------|------|------|------|
| <b>Retroperitoneum</b>                                            | 0.6  | 0.5  | 0.5   | 0.6  | 0.5  | 0.5  | 0.6  | 0.5  | 0.2  | 0.4  |
| <b>Peritoneum, Omentum,<br/>and Mesentery</b>                     | 0.1  | 1.5  | 0.1   | 0.8  | 0.1  | 0.9  | 0.2  | 1.2  | 0.1  | 0.8  |
| <b>Other Digestive Organs</b>                                     | 1    | 0.7  | 1.3   | 1.0  | 1    | 0.7  | 1.1  | 1    | 2.5  | 2.3  |
| <b>Nose, Nasal Cavity, and<br/>Middle Ear</b>                     | 1.2  | 0.7  | 1.3   | 0.7  | 1.1  | 0.6  | 1.0  | 0.7  | 1.7  | 1.1  |
| <b>Larynx</b>                                                     | 7.9  | 1.7  | 12.4  | 2.3  | 3.6  | 0.4  | 6.5  | 0.8  | 6.3  | 1.1  |
| <b>Lung Bronchus</b>                                              | 96.1 | 70.9 | 126.3 | 69.0 | 75.8 | 41.3 | 54.0 | 33.3 | 89.1 | 57.6 |
| <b>Pleura</b>                                                     | 0.1  | 0.0  | 0.0   | 0.0  | 0    | 0.0  | 0.1  | 0    | 0.1  | 0.0  |
| <b>Trachea, Mediastinum,<br/>and Other Respiratory<br/>Organs</b> | 0.3  | 0.1  | 0.3   | 0.2  | 0.3  | 0.1  | 0.3  | 0.1  | 0.4  | 0.0  |
| <b>Soft Tissue Including<br/>Heart</b>                            | 1.2  | 0.9  | 0.9   | 0.7  | 0.7  | 0.5  | 0.9  | 0.7  | 1.0  | 1.2  |
| <b>Skin Excluding Basal<br/>and Squamous</b>                      | 5.2  | 3.3  | 4.9   | 3.9  | 3.8  | 2.7  | 4.4  | 3.4  | 4.8  | 3.3  |
| <b>Melanoma of the Skin</b>                                       | 52.1 | 34.0 | 1.9   | 1.2  | 2.2  | 1.8  | 6.9  | 6.6  | 7.0  | 6.9  |
| <b>Other Non-Epithelial<br/>Skin</b>                              | 4.7  | 2.3  | 1.8   | 1.6  | 1.5  | 1.1  | 1.7  | 1.5  | 1.7  | 1.9  |
| <b>Urinary Bladder</b>                                            | 56.9 | 13.7 | 30.0  | 9.9  | 23.8 | 5.9  | 26.7 | 7.1  | 23.2 | 5.1  |
| <b>Kidney and Renal Pelvis</b>                                    | 26.2 | 12.4 | 31.8  | 15.0 | 16.2 | 7.5  | 26.2 | 14.6 | 44.8 | 22.4 |
| <b>Ureter</b>                                                     | 1.2  | 0.5  | 0.5   | 0.3  | 1    | 0.6  | 0.7  | 0.3  | 0.5  | 0.1  |
| <b>Other Urinary Organs</b>                                       | 0.8  | 0.2  | 0.9   | 0.5  | 0.5  | 0.2  | 0.5  | 0.2  | 0.6  | 0.1  |
| <b>Eye and Orbit</b>                                              | 1.6  | 1.2  | 0.3   | 0.2  | 0.3  | 0.2  | 0.8  | 0.5  | 0.4  | 0.6  |
| <b>Brain</b>                                                      | 10.7 | 7.1  | 5.3   | 3.6  | 4.6  | 3.1  | 6.8  | 5    | 6.0  | 3.5  |
| <b>Cranial Nerves Other<br/>Nervous System</b>                    | 0.5  | 0.4  | 0.5   | 0.4  | 0.4  | 0.4  | 0.4  | 0.4  | 0.3  | 0.5  |
| <b>Thyroid</b>                                                    | 8.7  | 22.8 | 4.2   | 13.3 | 7.6  | 23.6 | 6.2  | 21.8 | 6.6  | 21.5 |
| <b>Other Endocrine<br/>Including Thymus</b>                       | 0.8  | 0.7  | 1.1   | 1.1  | 1.2  | 0.9  | 0.7  | 0.6  | 0.7  | 0.3  |
| <b>Hodgkin Lymphoma</b>                                           | 4.3  | 3.4  | 4.0   | 2.9  | 1.7  | 1.3  | 3.4  | 2.3  | 1.7  | 1.5  |

|                                           |      |      |      |      |      |      |      |      |      |      |
|-------------------------------------------|------|------|------|------|------|------|------|------|------|------|
| <b>Non-Hodgkin<br/>Lymphoma</b>           | 36.2 | 23.8 | 26.8 | 17.3 | 23.8 | 16.1 | 28.0 | 20.7 | 21.5 | 18.1 |
| <b>Myeloma</b>                            | 10.6 | 6.3  | 22.1 | 15.9 | 6.6  | 4.5  | 9.9  | 6.8  | 10.2 | 8.6  |
| <b>Lymphocytic Leukemia</b>               | 13.4 | 6.8  | 8.7  | 4.4  | 3.4  | 1.9  | 6.2  | 3.9  | 5.3  | 3.1  |
| <b>Myeloid and Monocytic<br/>Leukemia</b> | 10.7 | 6.6  | 8.9  | 6.3  | 8.3  | 5.2  | 8.2  | 5.6  | 7.6  | 4.7  |
| <b>Other Leukemia</b>                     | 1.3  | 0.8  | 1.3  | 1.0  | 0.9  | 0.6  | 0.9  | 0.6  | 1.4  | 0.9  |
| <b>Mesothelioma</b>                       | 2.7  | 0.6  | 1.4  | 0.3  | 0.9  | 0.3  | 2.4  | 0.6  | 2.2  | 0.7  |
| <b>Kaposi Sarcoma</b>                     | 3.6  | 0.1  | 7.1  | 0.3  | 0.9  | 0.0  | 3.7  | 0.3  | 2.1  | 0.3  |

**Table S3.** Male and female incidence rates per 100,000 select histological cancer subtypes by racial and ethnic group, SEER 2000-2019.

|                                                                                                                                                                                                                           | Incidence rates per 100,000 population |             |                    |             |                                     |             |           |             | Non-Hispanic American Indian/Alaskan Native |             |
|---------------------------------------------------------------------------------------------------------------------------------------------------------------------------------------------------------------------------|----------------------------------------|-------------|--------------------|-------------|-------------------------------------|-------------|-----------|-------------|---------------------------------------------|-------------|
|                                                                                                                                                                                                                           | Non-Hispanic White                     |             | Non-Hispanic Black |             | Non-Hispanic Asian Pacific Islander |             | Latino    |             |                                             |             |
|                                                                                                                                                                                                                           | Male rate                              | Female rate | Male rate          | Female rate | Male rate                           | Female rate | Male rate | Female rate | Male rate                                   | Female rate |
| Esophagus Adenocarcinoma                                                                                                                                                                                                  | 2.3                                    | 1.4         | 8.6                | 3.2         | 4.2                                 | 1.1         | 2.7       | 0.7         | 5.1                                         | 1.7         |
| Esophagus SCC                                                                                                                                                                                                             | 7.7                                    | 1.0         | 1.6                | 0.5         | 1.4                                 | 0.2         | 3.8       | 0.5         | 4.6                                         | 1.4         |
| Gastric Cardia Adenocarcinoma                                                                                                                                                                                             | 5.7                                    | 1.3         | 3.1                | 1.1         | 3.7                                 | 1.1         | 3.8       | 1.3         | 6.0                                         | 2.0         |
| Gastric Non-Cardia Adenocarcinoma                                                                                                                                                                                         | 7.7                                    | 5.0         | 20.9               | 11.6        | 22.4                                | 13.9        | 19.5      | 13.2        | 23.8                                        | 14.2        |
| Liver HCC                                                                                                                                                                                                                 | 10.2                                   | 3.0         | 20.7               | 5.8         | 27.8                                | 9.4         | 23.6      | 8.2         | 24.8                                        | 12.0        |
| Liver ICC                                                                                                                                                                                                                 | 1.6                                    | 1.1         | 1.4                | 1.1         | 2.4                                 | 1.7         | 2.0       | 1.7         | 3.3                                         | 2.4         |
| Lung and Bronchus Adenocarcinoma                                                                                                                                                                                          | 32.4                                   | 29.3        | 42.4               | 29.0        | 32.5                                | 24.9        | 19.2      | 14.9        | 21.0                                        | 17.1        |
| Lung and Bronchus SCC                                                                                                                                                                                                     | 21.8                                   | 10.2        | 31.6               | 11.9        | 14.7                                | 3.8         | 11.4      | 4.6         | 25.5                                        | 12.6        |
| Lung and Bronchus Small Cell Carcinoma                                                                                                                                                                                    | 13.2                                   | 12.1        | 12.4               | 8.9         | 7.7                                 | 3.1         | 6.6       | 4.7         | 13.7                                        | 10.8        |
| Lung and Bronchus Large Cell Carcinoma                                                                                                                                                                                    | 2.8                                    | 1.9         | 4.6                | 1.9         | 1.7                                 | 0.7         | 1.2       | 0.7         | 1.2                                         | 0.7         |
| Urinary Bladder TCC                                                                                                                                                                                                       | 53.8                                   | 12.6        | 27.1               | 8.5         | 22.4                                | 5.4         | 24.8      | 6.2         | 20.7                                        | 3.8         |
| Abbreviations: MF IRR, male-to-female incidence rate ratio; CI, confidence interval; SCC, squamous cell carcinoma; HCC, hepatocellular carcinoma; ICC, intrahepatic cholangiocarcinoma; TCC, transitional cell carcinoma. |                                        |             |                    |             |                                     |             |           |             |                                             |             |

**Table S4. Male and female incidence rates per 100,000 by 10-year age groups among non-Hispanic White individuals, SEER 2000-2019.**

|                                    | 20–29 years |             | 30–39 years |             | 40–49 years |             | 50–59 years |             | 60–69 years |             | 70–79 years |             | 80+ years |             |
|------------------------------------|-------------|-------------|-------------|-------------|-------------|-------------|-------------|-------------|-------------|-------------|-------------|-------------|-----------|-------------|
| Cancer Site                        | Male rate   | Female rate | Male rate | Female rate |
| Lip                                | 0.1         | 0.0         | 0.4         | 0.1         | 1.1         | 0.3         | 2.2         | 0.6         | 4.3         | 1.1         | 7.9         | 1.9         | 10.4      | 3.0         |
| Tongue                             | 0.3         | 0.2         | 0.9         | 0.6         | 3.8         | 1.5         | 11.1        | 3.3         | 17.3        | 5.2         | 15.1        | 6.5         | 10.4      | 6.7         |
| Salivary Gland                     | 0.3         | 0.4         | 0.4         | 0.6         | 0.9         | 0.8         | 1.9         | 1.2         | 3.8         | 2.0         | 6.4         | 2.9         | 11.2      | 3.8         |
| Floor of Mouth                     | 0.0         | 0.0         | 0.1         | 0.0         | 0.6         | 0.2         | 2.0         | 0.7         | 3.2         | 1.2         | 2.9         | 1.7         | 1.9       | 1.4         |
| Gum and Other Mouth                | 0.1         | 0.2         | 0.3         | 0.3         | 1.0         | 0.6         | 2.7         | 1.6         | 4.8         | 3.1         | 6.9         | 5.6         | 8.4       | 8.7         |
| Nasopharynx                        | 0.1         | 0.0         | 0.2         | 0.1         | 0.5         | 0.2         | 1.1         | 0.3         | 1.4         | 0.5         | 1.2         | 0.6         | 1.1       | 0.6         |
| Tonsil                             | 0.0         | 0.0         | 0.3         | 0.1         | 3.7         | 0.6         | 9.4         | 1.6         | 10.0        | 2.2         | 5.9         | 2           | 3.0       | 1.0         |
| Oropharynx                         | 0.0         | 0.0         | 0.0         | 0.0         | 0.4         | 0.1         | 1.4         | 0.3         | 2.3         | 0.6         | 1.9         | 0.6         | 1.3       | 0.6         |
| Hypopharynx                        | 0.0         | 0.0         | 0.0         | 0.0         | 0.5         | 0.1         | 1.9         | 0.4         | 3.3         | 0.9         | 4.2         | 1.3         | 2.7       | 0.8         |
| Other Oral Cavity and Pharynx      | 0.0         | 0.0         | 0.0         | 0.0         | 0.2         | 0.1         | 0.6         | 0.2         | 1.0         | 0.3         | 1.1         | 0.6         | 1.2       | 0.5         |
| Esophagus                          | 0.1         | 0.0         | 0.5         | 0.1         | 2.6         | 0.5         | 10.2        | 2.1         | 24.8        | 5.2         | 33.9        | 9.7         | 35.2      | 12.3        |
| Stomach                            | 0.2         | 0.2         | 0.9         | 0.6         | 3.2         | 1.7         | 9.4         | 3.9         | 22.1        | 8.4         | 38.8        | 17          | 52.5      | 28.7        |
| Small Intestine                    | 0.1         | 0.1         | 0.4         | 0.4         | 1.4         | 1.1         | 3.4         | 2.6         | 6.0         | 4.4         | 8.5         | 6.2         | 9.4       | 6.7         |
| Colon and Rectum                   | 1.7         | 1.8         | 6.5         | 5.8         | 21.8        | 18.5        | 64.6        | 45.4        | 127.8       | 88.1        | 218.9       | 174.6       | 294.5     | 273.4       |
| Anus, Anal Canal, and Anorectum    | 0.0         | 0.0         | 0.4         | 0.3         | 1.6         | 1.9         | 3.1         | 4.4         | 3.9         | 6.4         | 4.2         | 6.6         | 4.6       | 6.2         |
| Liver                              | 0.2         | 0.2         | 0.5         | 0.4         | 3.0         | 1.0         | 15.6        | 3.8         | 28.6        | 8.3         | 31.1        | 13.3        | 30.7      | 16.6        |
| Gallbladder                        | 0.0         | 0.0         | 0.1         | 0.1         | 0.2         | 0.3         | 0.5         | 1.0         | 1.5         | 2.8         | 3.2         | 6.2         | 5.3       | 9.0         |
| Other Biliary                      | 0.0         | 0.0         | 0.2         | 0.1         | 0.5         | 0.3         | 1.7         | 1.2         | 4.5         | 3.0         | 8.7         | 6.1         | 14.3      | 10.1        |
| Pancreas                           | 0.1         | 0.2         | 0.8         | 0.7         | 4.1         | 2.8         | 15.4        | 9.9         | 37.4        | 26.6        | 62.2        | 51.9        | 81.7      | 76.4        |
| Retroperitoneum                    | 0.1         | 0.1         | 0.2         | 0.2         | 0.3         | 0.3         | 0.6         | 0.6         | 1.0         | 0.9         | 1.5         | 1.3         | 1.7       | 1.1         |
| Peritoneum, Omentum, and Mesentery | 0.0         | 0.0         | 0.0         | 0.1         | 0.0         | 0.5         | 0.1         | 1.4         | 0.2         | 3.7         | 0.3         | 5.4         | 0.4       | 3.7         |
| Other Digestive Organs             | 0.0         | 0.0         | 0.1         | 0.1         | 0.2         | 0.2         | 0.7         | 0.5         | 1.6         | 1.2         | 3.2         | 2.3         | 4.9       | 4.2         |



|                                                           |     |      |      |      |      |      |      |      |       |       |       |       |       |       |
|-----------------------------------------------------------|-----|------|------|------|------|------|------|------|-------|-------|-------|-------|-------|-------|
| <b>Nose, Nasal Cavity, and Middle Ear</b>                 | 0.1 | 0.1  | 0.3  | 0.2  | 0.5  | 0.4  | 1.1  | 0.7  | 2.2   | 1.2   | 2.9   | 1.8   | 3.8   | 2.4   |
| <b>Larynx</b>                                             | 0.1 | 0.0  | 0.3  | 0.2  | 2.3  | 0.7  | 9.0  | 2.3  | 19.0  | 4.0   | 23.4  | 4.7   | 20.5  | 2.9   |
| <b>Lung Bronchus</b>                                      | 0.4 | 0.4  | 2.1  | 2.3  | 14.1 | 13.9 | 64.6 | 55.1 | 195.8 | 150.5 | 351.0 | 267.5 | 362.9 | 237.7 |
| <b>Pleura</b>                                             | 0.0 | 0.0  | 0.0  | 0.0  | 0.0  | 0.0  | 0.0  | 0.0  | 0.1   | 0.0   | 0.2   | 0.1   | 0.5   | 0.2   |
| <b>Trachea, Mediastinum, and Other Respiratory Organs</b> | 0.3 | 0.0  | 0.2  | 0.0  | 0.2  | 0.1  | 0.3  | 0.1  | 0.4   | 0.2   | 0.4   | 0.3   | 0.6   | 0.3   |
| <b>Soft Tissue Including Heart</b>                        | 1.0 | 0.8  | 0.7  | 0.6  | 0.8  | 0.8  | 1.1  | 0.8  | 1.4   | 1.0   | 1.6   | 1     | 2.2   | 1.6   |
| <b>Skin Excluding Basal and Squamous</b>                  | 1.4 | 1.1  | 2.0  | 1.4  | 2.8  | 2.0  | 4.5  | 3.1  | 7.2   | 4.8   | 10.8  | 6.7   | 15.8  | 8.5   |
| <b>Melanoma of the Skin</b>                               | 6.1 | 12.2 | 15.2 | 22.6 | 28.3 | 30.2 | 50.2 | 36.7 | 82.2  | 44.8  | 109.1 | 47.7  | 127.5 | 49.7  |
| <b>Other Non-Epithelial Skin</b>                          | 0.5 | 0.6  | 0.8  | 0.9  | 1.4  | 1.1  | 2.3  | 1.5  | 5.3   | 2.8   | 11.6  | 5.3   | 24.3  | 9.7   |
| <b>Urinary Bladder</b>                                    | 0.6 | 0.3  | 2.2  | 0.8  | 9.0  | 2.7  | 32.4 | 9.5  | 95.9  | 24.8  | 190.1 | 47.4  | 266.1 | 64.1  |
| <b>Kidney and Renal Pelvis</b>                            | 0.6 | 0.5  | 3.2  | 2.1  | 11.4 | 5.7  | 28.0 | 13.2 | 51.1  | 23.6  | 65.0  | 33.6  | 61.3  | 33.3  |
| <b>Ureter</b>                                             | 0.0 | 0.0  | 0.0  | 0.0  | 0.1  | 0.0  | 0.4  | 0.2  | 1.6   | 0.7   | 3.3   | 1.8   | 4.7   | 2.8   |
| <b>Other Urinary Organs</b>                               | 0.0 | 0.0  | 0.0  | 0.0  | 0.1  | 0.0  | 0.3  | 0.2  | 0.9   | 0.4   | 1.8   | 0.6   | 3.7   | 1.2   |
| <b>Eye and Orbit</b>                                      | 0.1 | 0.2  | 0.4  | 0.4  | 0.9  | 0.7  | 1.9  | 1.4  | 2.9   | 2.3   | 3.9   | 2.7   | 4.5   | 2.7   |
| <b>Brain</b>                                              | 3.4 | 2.7  | 4.7  | 3.5  | 6.6  | 4.5  | 11.7 | 7.4  | 18.0  | 11.8  | 22.8  | 16.6  | 22.1  | 15.3  |
| <b>Cranial Nerves Other Nervous System</b>                | 0.2 | 0.2  | 0.3  | 0.3  | 0.4  | 0.4  | 0.5  | 0.5  | 0.6   | 0.6   | 0.8   | 0.6   | 0.6   | 0.6   |
| <b>Thyroid</b>                                            | 2.9 | 14.0 | 6.0  | 23.7 | 8.0  | 25.8 | 10.5 | 25.9 | 12.1  | 21.8  | 10.2  | 16.2  | 6.8   | 9.1   |
| <b>Other Endocrine Including Thymus</b>                   | 0.3 | 0.2  | 0.4  | 0.3  | 0.6  | 0.5  | 1.0  | 0.8  | 1.3   | 1.2   | 1.5   | 1.2   | 1.3   | 1.1   |
| <b>Hodgkin Lymphoma</b>                                   | 5.5 | 5.7  | 4.3  | 3.9  | 3.4  | 2.2  | 3.0  | 1.7  | 3.3   | 2.1   | 3.9   | 2.9   | 4.1   | 2.8   |
| <b>Non-Hodgkin Lymphoma</b>                               | 3.8 | 2.4  | 9.5  | 4.9  | 16.7 | 10.0 | 31.6 | 21.2 | 57.5  | 41.6  | 94.7  | 71.5  | 118.6 | 84.0  |
| <b>Myeloma</b>                                            | 0.1 | 0.0  | 0.6  | 0.3  | 2.5  | 1.8  | 8.5  | 5.3  | 20.1  | 13.0  | 34.3  | 22    | 43.7  | 26.4  |
| <b>Lymphocytic Leukemia</b>                               | 0.8 | 0.5  | 1.4  | 0.7  | 4.0  | 2.0  | 11.9 | 5.9  | 25.5  | 13.0  | 39.6  | 22.2  | 51.6  | 29.6  |

|                                       |     |     |     |     |     |     |     |     |      |     |      |      |      |      |
|---------------------------------------|-----|-----|-----|-----|-----|-----|-----|-----|------|-----|------|------|------|------|
| <b>Myeloid and Monocytic Leukemia</b> | 1.5 | 1.5 | 2.4 | 1.9 | 3.6 | 2.8 | 6.5 | 4.8 | 14.6 | 8.7 | 29.6 | 16.5 | 41.5 | 24.5 |
| <b>Other Leukemia</b>                 | 0.1 | 0.1 | 0.2 | 0.1 | 0.2 | 0.2 | 0.5 | 0.4 | 1.6  | 1.0 | 3.9  | 2.4  | 9.1  | 6.2  |
| <b>Mesothelioma</b>                   | 0.0 | 0.0 | 0.1 | 0.1 | 0.2 | 0.2 | 1.2 | 0.5 | 4.3  | 1.0 | 10.4 | 2.1  | 15.1 | 2.5  |
| <b>Kaposi Sarcoma</b>                 | 1.3 | 0.0 | 6.7 | 0.1 | 5.2 | 0.0 | 2.2 | 0.0 | 1.2  | 0.1 | 1.3  | 0.3  | 2.4  | 1.0  |

**Table S5. Male and female incidence rates per 100,000 by 10-year age groups among non-Hispanic Black individuals, SEER 2000-2019.**

|                                    | 20–29 years |             | 30–39 years |             | 40–49 years |             | 50–59 years |             | 60–69 years |             | 70–79 years |             | 80+ years |             |
|------------------------------------|-------------|-------------|-------------|-------------|-------------|-------------|-------------|-------------|-------------|-------------|-------------|-------------|-----------|-------------|
| Cancer Site                        | Male rate   | Female rate | Male rate | Female rate |
| Lip                                | 0.0         | 0.0         | 0.0         | 0.1         | 0.1         | 0.1         | 0.2         | 0.1         | 0.3         | 0.2         | 0.5         | 0.2         | 1.4       | 0.3         |
| Tongue                             | 0.1         | 0.0         | 0.5         | 0.3         | 3.0         | 1.1         | 8.1         | 2.5         | 12.1        | 2.7         | 9.2         | 3.0         | 7.2       | 2.7         |
| Salivary Gland                     | 0.4         | 0.4         | 0.4         | 0.8         | 1.2         | 1.0         | 1.8         | 1.3         | 2.5         | 2.2         | 3.4         | 1.6         | 5.0       | 2.9         |
| Floor of Mouth                     | 0.0         | 0.0         | 0.2         | 0.0         | 0.9         | 0.2         | 2.6         | 0.7         | 3.4         | 1.1         | 3.1         | 1.1         | 1.8       | 0.8         |
| Gum and Other Mouth                | 0.1         | 0.2         | 0.4         | 0.3         | 1.5         | 0.9         | 3.7         | 2.2         | 5.3         | 2.7         | 5.0         | 4.3         | 6.4       | 4.8         |
| Nasopharynx                        | 0.3         | 0.1         | 0.5         | 0.2         | 1.5         | 0.4         | 1.7         | 0.4         | 1.8         | 0.8         | 2.5         | 1.2         | 1.3       | 0.3         |
| Tonsil                             | 0.0         | 0.0         | 0.3         | 0.1         | 3.1         | 0.7         | 7.7         | 1.4         | 9.0         | 2.3         | 7.3         | 1.7         | 5.1       | 0.4         |
| Oropharynx                         | 0.0         | 0.0         | 0.1         | 0.0         | 0.7         | 0.2         | 2.3         | 0.6         | 4.0         | 0.9         | 3.4         | 0.7         | 1.2       | 0.6         |
| Hypopharynx                        | 0.0         | 0.0         | 0.0         | 0.0         | 0.9         | 0.3         | 3.3         | 0.9         | 6.0         | 1.3         | 6.3         | 1.1         | 4.4       | 0.6         |
| Other Oral Cavity and Pharynx      | 0.0         | 0.0         | 0.0         | 0.0         | 0.3         | 0.1         | 1.0         | 0.1         | 1.5         | 0.6         | 1.9         | 0.6         | 0.9       | 0.6         |
| Esophagus                          | 0.1         | 0.0         | 0.3         | 0.2         | 3.3         | 1.4         | 12.7        | 4.4         | 26.9        | 9.5         | 31.5        | 12.4        | 23.3      | 10.7        |
| Stomach                            | 0.4         | 0.3         | 1.7         | 1.5         | 6.0         | 4.0         | 16.9        | 9.2         | 38.6        | 17.7        | 68.6        | 37.0        | 93.5      | 64.3        |
| Small Intestine                    | 0.1         | 0.1         | 0.7         | 0.7         | 2.5         | 2.1         | 5.1         | 4.3         | 9.7         | 7.9         | 12.3        | 10.7        | 14.0      | 11.9        |
| Colon and Rectum                   | 1.6         | 1.4         | 7.0         | 7.2         | 28.2        | 24.8        | 86.8        | 68.9        | 163.4       | 124.6       | 236.2       | 200.2       | 289.6     | 273.7       |
| Anus, Anal Canal, and Anorectum    | 0.3         | 0.0         | 1.8         | 0.3         | 4.0         | 1.5         | 5.0         | 3.6         | 3.7         | 4.4         | 3.5         | 4.3         | 4.0       | 4.9         |
| Liver                              | 0.4         | 0.2         | 1.5         | 0.5         | 6.4         | 1.8         | 32.6        | 8.5         | 66.4        | 18.1        | 49.8        | 19.2        | 38.5      | 22.5        |
| Gallbladder                        | 0.0         | 0.0         | 0.1         | 0.2         | 0.3         | 0.7         | 0.9         | 2.6         | 3.0         | 5.1         | 5.1         | 8.0         | 4.7       | 10.2        |
| Other Biliary                      | 0.0         | 0.0         | 0.2         | 0.1         | 0.6         | 0.5         | 1.9         | 1.5         | 5.6         | 4.0         | 8.3         | 7.2         | 12.9      | 9.5         |
| Pancreas                           | 0.1         | 0.2         | 1.1         | 0.9         | 5.6         | 4.3         | 22.9        | 15.9        | 49.5        | 40.1        | 70.9        | 73.6        | 88.8      | 105         |
| Retroperitoneum                    | 0.0         | 0.1         | 0.2         | 0.2         | 0.2         | 0.4         | 0.4         | 0.8         | 0.8         | 1.0         | 1.5         | 1.7         | 0.7       | 1.2         |
| Peritoneum, Omentum, and Mesentery | 0.0         | 0.0         | 0.0         | 0.0         | 0.1         | 0.1         | 0.0         | 0.7         | 0.4         | 2.0         | 0.1         | 2.8         | 0.6       | 1.8         |
| Other Digestive Organs             | 0.0         | 0.0         | 0.2         | 0.1         | 0.3         | 0.2         | 1.0         | 0.6         | 2.2         | 2.0         | 3.9         | 2.9         | 4.4       | 5.5         |

|                                                           |     |     |      |      |      |      |      |      |       |       |       |       |       |       |
|-----------------------------------------------------------|-----|-----|------|------|------|------|------|------|-------|-------|-------|-------|-------|-------|
| <b>Nose, Nasal Cavity, and Middle Ear</b>                 | 0.1 | 0.1 | 0.4  | 0.3  | 0.8  | 0.5  | 1.5  | 0.7  | 1.7   | 1.1   | 2.5   | 1.7   | 3.1   | 2.6   |
| <b>Larynx</b>                                             | 0.1 | 0.0 | 0.4  | 0.2  | 3.7  | 0.9  | 15.1 | 3.4  | 31.3  | 6.5   | 31.4  | 5.5   | 28.1  | 4.0   |
| <b>Lung Bronchus</b>                                      | 0.4 | 0.4 | 3.4  | 2.6  | 24.7 | 18.4 | 111  | 67   | 275.5 | 156.4 | 416.1 | 236.5 | 404.1 | 211.1 |
| <b>Pleura</b>                                             | 0.0 | 0.0 | 0.0  | 0.0  | 0.0  | 0.0  | 0.0  | 0.1  | 0.0   | 0.1   | 0.1   | 0.1   | 0.0   | 0.2   |
| <b>Trachea, Mediastinum, and Other Respiratory Organs</b> | 0.2 | 0.1 | 0.1  | 0.0  | 0.2  | 0.1  | 0.3  | 0.2  | 0.4   | 0.2   | 0.2   | 0.5   | 0.8   | 0.4   |
| <b>Soft Tissue Including Heart</b>                        | 0.6 | 0.6 | 0.6  | 0.5  | 0.8  | 0.6  | 0.7  | 0.7  | 1.3   | 0.8   | 0.9   | 0.9   | 1.8   | 1.4   |
| <b>Skin Excluding Basal and Squamous</b>                  | 1.8 | 1.3 | 2.6  | 1.9  | 3.8  | 2.5  | 4.7  | 4.6  | 7.0   | 5.7   | 6.9   | 7.0   | 9.8   | 9.3   |
| <b>Melanoma of the Skin</b>                               | 0.1 | 0.2 | 0.3  | 0.6  | 0.5  | 0.6  | 1.4  | 0.9  | 2.9   | 1.6   | 4.5   | 3.1   | 7.0   | 4.1   |
| <b>Other Non-Epithelial Skin</b>                          | 0.7 | 0.9 | 1.2  | 1.2  | 1.4  | 1.6  | 1.5  | 1.2  | 1.7   | 1.5   | 2.8   | 2.3   | 3.1   | 2.9   |
| <b>Urinary Bladder</b>                                    | 0.2 | 0.1 | 1.3  | 0.4  | 4.9  | 1.4  | 18.6 | 5.7  | 47.1  | 16.2  | 85.3  | 36.3  | 129.4 | 54.8  |
| <b>Kidney and Renal Pelvis</b>                            | 0.9 | 0.8 | 4.0  | 2.4  | 14.7 | 7.4  | 36.3 | 15.2 | 61.6  | 29.8  | 62.9  | 39.9  | 52.3  | 36.3  |
| <b>Ureter</b>                                             | 0.0 | 0.0 | 0.0  | 0.0  | 0.0  | 0.0  | 0.1  | 0.1  | 0.9   | 0.2   | 1.4   | 1.0   | 2.4   | 1.8   |
| <b>Other Urinary Organs</b>                               | 0.0 | 0.0 | 0.0  | 0.0  | 0.2  | 0.2  | 0.3  | 0.5  | 1.2   | 1.1   | 2.2   | 1.3   | 3.0   | 1.7   |
| <b>Eye and Orbit</b>                                      | 0.0 | 0.0 | 0.1  | 0.1  | 0.2  | 0.1  | 0.2  | 0.1  | 0.5   | 0.4   | 0.7   | 0.2   | 0.7   | 0.6   |
| <b>Brain</b>                                              | 1.3 | 1.3 | 2.2  | 1.6  | 3.3  | 2.4  | 6.0  | 3.7  | 8.8   | 6.1   | 10.5  | 8.8   | 11.8  | 8.1   |
| <b>Cranial Nerves Other Nervous System</b>                | 0.2 | 0.3 | 0.3  | 0.2  | 0.3  | 0.4  | 0.6  | 0.6  | 0.6   | 0.5   | 1.1   | 0.7   | 0.8   | 0.9   |
| <b>Thyroid</b>                                            | 0.7 | 4.3 | 1.8  | 10.0 | 3.4  | 14.6 | 5.6  | 16.8 | 5.5   | 17.8  | 7.5   | 15.5  | 4.5   | 8.5   |
| <b>Other Endocrine Including Thymus</b>                   | 0.2 | 0.3 | 0.4  | 0.6  | 0.9  | 0.7  | 1.4  | 1.2  | 1.7   | 2.1   | 1.9   | 1.8   | 1.9   | 1.8   |
| <b>Hodgkin Lymphoma</b>                                   | 3.9 | 3.9 | 4.0  | 3.3  | 4.3  | 2.4  | 3.7  | 2.4  | 3.0   | 2.0   | 3.0   | 2.2   | 1.6   | 1.4   |
| <b>Non-Hodgkin Lymphoma</b>                               | 4.8 | 3.0 | 11.6 | 5.7  | 19.8 | 10.9 | 28.8 | 18.1 | 41.4  | 28.9  | 50.7  | 43.8  | 52    | 47.4  |
| <b>Myeloma</b>                                            | 0.1 | 0.0 | 1.6  | 1.1  | 6.1  | 5.9  | 21.1 | 16.2 | 44.1  | 33.0  | 65.1  | 54.8  | 76.4  | 58.3  |
| <b>Lymphocytic Leukemia</b>                               | 0.7 | 0.3 | 0.9  | 0.5  | 2.5  | 1.2  | 7.2  | 3.3  | 16.5  | 8.9   | 24.2  | 14.1  | 33.6  | 18.9  |

|                                       |     |     |      |     |     |     |     |     |      |     |     |      |      |     |
|---------------------------------------|-----|-----|------|-----|-----|-----|-----|-----|------|-----|-----|------|------|-----|
| <b>Myeloid and Monocytic Leukemia</b> | 1.7 | 1.4 | 2.7  | 2.2 | 4.4 | 3.0 | 5.9 | 4.9 | 11.7 | 8.7 | 20  | 13.8 | 28.4 | 22  |
| <b>Other Leukemia</b>                 | 0.2 | 0.1 | 0.3  | 0.2 | 0.5 | 0.4 | 0.9 | 0.8 | 2.1  | 1.2 | 2.8 | 2.7  | 6.2  | 5.0 |
| <b>Mesothelioma</b>                   | 0.0 | 0.0 | 0.0  | 0.1 | 0.2 | 0.1 | 0.7 | 0.2 | 2.2  | 0.6 | 4.8 | 1.4  | 7.4  | 1.4 |
| <b>Kaposi Sarcoma</b>                 | 5.2 | 0.1 | 13.8 | 0.4 | 9.6 | 0.5 | 3.8 | 0.3 | 1.7  | 0.1 | 1.5 | 0.4  | 1.9  | 0.5 |

**Table S6.** Male and female incidence rates per 100,000 by 10-year age groups among non-Hispanic Asian American/Pacific Islander individuals, SEER 2000-2019.

|                                           | 20–29 years |             | 30–39 years |             | 40–49 years |             | 50–59 years |             | 60–69 years |             | 70–79 years |             | 80+ years |             |
|-------------------------------------------|-------------|-------------|-------------|-------------|-------------|-------------|-------------|-------------|-------------|-------------|-------------|-------------|-----------|-------------|
| Cancer Site                               | Male rate   | Female rate | Male rate | Female rate |
| <b>Lip</b>                                | 0.0         | 0.0         | 0.1         | 0.0         | 0.1         | 0.0         | 0.2         | 0.1         | 0.3         | 0.3         | 0.3         | 0.4         | 0.4       | 0.6         |
| <b>Tongue</b>                             | 0.2         | 0.1         | 0.9         | 0.7         | 1.7         | 1.1         | 4.1         | 2.3         | 6.6         | 3.6         | 8.8         | 4.7         | 9.1       | 6.6         |
| <b>Salivary Gland</b>                     | 0.4         | 0.5         | 0.5         | 0.7         | 1.1         | 1.1         | 1.5         | 1.4         | 2.6         | 2.0         | 3.3         | 2.1         | 3.9       | 2.5         |
| <b>Floor of Mouth</b>                     | 0.0         | 0.0         | 0.0         | 0.0         | 0.2         | 0.1         | 0.5         | 0.2         | 1.0         | 0.3         | 1.0         | 0.7         | 0.7       | 0.7         |
| <b>Gum and Other Mouth</b>                | 0.1         | 0.2         | 0.3         | 0.3         | 0.8         | 0.5         | 2.0         | 0.9         | 3.8         | 2.0         | 5.4         | 3.7         | 6.4       | 6.6         |
| <b>Nasopharynx</b>                        | 0.7         | 0.5         | 3           | 1.4         | 7.7         | 2.5         | 9.6         | 3.2         | 9.6         | 3.0         | 7.6         | 2.3         | 4.9       | 2.5         |
| <b>Tonsil</b>                             | 0.0         | 0.0         | 0.2         | 0.1         | 0.9         | 0.2         | 2.3         | 0.4         | 3.8         | 0.9         | 3.1         | 0.5         | 2.2       | 0.7         |
| <b>Oropharynx</b>                         | 0.0         | 0.0         | 0.0         | 0.0         | 0.1         | 0.1         | 0.4         | 0.1         | 0.6         | 0.2         | 0.7         | 0.1         | 0.8       | 0.5         |
| <b>Hypopharynx</b>                        | 0.0         | 0.0         | 0.1         | 0.0         | 0.4         | 0.1         | 1.0         | 0.2         | 2.9         | 0.3         | 4.1         | 0.4         | 4.9       | 0.5         |
| <b>Other Oral Cavity and Pharynx</b>      | 0.0         | 0.0         | 0.0         | 0.0         | 0.0         | 0.0         | 0.1         | 0.1         | 0.3         | 0.0         | 0.6         | 0.1         | 1.3       | 0.1         |
| <b>Esophagus</b>                          | 0.1         | 0.0         | 0.2         | 0.0         | 1.2         | 0.2         | 5.5         | 1.0         | 13.4        | 2.6         | 20.2        | 5.1         | 22.9      | 8.0         |
| <b>Stomach</b>                            | 0.5         | 0.6         | 1.9         | 2.2         | 6.8         | 5.1         | 17.1        | 10.0        | 41.6        | 21.5        | 86.9        | 44.9        | 125.8     | 74.9        |
| <b>Small Intestine</b>                    | 0.0         | 0.1         | 0.3         | 0.2         | 0.7         | 0.6         | 2.0         | 1.0         | 3.5         | 2.4         | 6.0         | 3.7         | 5.9       | 5.2         |
| <b>Colon and Rectum</b>                   | 1.5         | 1.4         | 6.6         | 5.8         | 23.8        | 18.8        | 72          | 50.3        | 133.1       | 82.2        | 202.3       | 134.8       | 241.5     | 206.3       |
| <b>Anus, Anal Canal, and Anorectum</b>    | 0.1         | 0.0         | 0.1         | 0.1         | 0.5         | 0.4         | 0.7         | 0.9         | 1.2         | 1.1         | 1.7         | 2.3         | 2.0       | 2.8         |
| <b>Liver</b>                              | 0.5         | 0.2         | 3.2         | 0.7         | 13.3        | 2.8         | 37.7        | 7.7         | 68.1        | 22.7        | 88.2        | 42.9        | 88.1      | 50.6        |
| <b>Gallbladder</b>                        | 0.0         | 0.0         | 0.0         | 0.1         | 0.2         | 0.5         | 1.1         | 1.6         | 2.8         | 3.7         | 5.6         | 7.2         | 8.5       | 11.6        |
| <b>Other Biliary</b>                      | 0.0         | 0.0         | 0.1         | 0.2         | 0.9         | 0.6         | 2.7         | 1.7         | 8.1         | 4.7         | 15.7        | 8.8         | 20.3      | 17.0        |
| <b>Pancreas</b>                           | 0.1         | 0.2         | 0.9         | 0.7         | 3.5         | 2.6         | 11.6        | 7.8         | 30.4        | 22.2        | 54.0        | 46.8        | 82.0      | 76.0        |
| <b>Retroperitoneum</b>                    | 0.1         | 0.0         | 0.1         | 0.2         | 0.3         | 0.4         | 0.5         | 0.7         | 1.1         | 0.9         | 1.3         | 1.2         | 1.0       | 0.9         |
| <b>Peritoneum, Omentum, and Mesentery</b> | 0.0         | 0.0         | 0.0         | 0.1         | 0.1         | 0.4         | 0.1         | 0.9         | 0.2         | 2.3         | 0.1         | 3.3         | 0.2       | 1.9         |
| <b>Other Digestive Organs</b>             | 0.0         | 0.0         | 0.1         | 0.0         | 0.2         | 0.2         | 0.8         | 0.6         | 1.5         | 1.0         | 2.7         | 1.9         | 6.8       | 5.2         |

|                                                           |     |      |     |      |      |      |      |      |       |      |       |       |       |       |
|-----------------------------------------------------------|-----|------|-----|------|------|------|------|------|-------|------|-------|-------|-------|-------|
| <b>Nose, Nasal Cavity, and Middle Ear</b>                 | 0.2 | 0.1  | 0.3 | 0.2  | 0.8  | 0.3  | 1.1  | 0.7  | 2.3   | 1.1  | 2.4   | 1.7   | 2.7   | 1.8   |
| <b>Larynx</b>                                             | 0.0 | 0.0  | 0.2 | 0.0  | 0.8  | 0.1  | 3.5  | 0.4  | 8.0   | 1.1  | 12.1  | 1.3   | 14.2  | 1.3   |
| <b>Lung Bronchus</b>                                      | 0.4 | 0.4  | 2.3 | 2.4  | 11.7 | 9.6  | 49.8 | 31.8 | 149.4 | 79.3 | 291.9 | 148.2 | 346.5 | 187.7 |
| <b>Pleura</b>                                             | 0.0 | 0.0  | 0.0 | 0.0  | 0.0  | 0.0  | 0.0  | 0.0  | 0.0   | 0.0  | 0.1   | 0.1   | 0.2   | 0.1   |
| <b>Trachea, Mediastinum, and Other Respiratory Organs</b> | 0.5 | 0.0  | 0.2 | 0.1  | 0.2  | 0.1  | 0.2  | 0.1  | 0.3   | 0.1  | 0.2   | 0.2   | 0.4   | 0.3   |
| <b>Soft Tissue Including Heart</b>                        | 0.6 | 0.4  | 0.4 | 0.3  | 0.7  | 0.5  | 0.6  | 0.4  | 0.9   | 0.5  | 1.2   | 0.7   | 0.7   | 1.4   |
| <b>Skin Excluding Basal and Squamous</b>                  | 1.1 | 0.9  | 1.8 | 1.4  | 2.3  | 1.7  | 3.6  | 2.5  | 5.1   | 4.3  | 8.5   | 5.5   | 11.0  | 7.4   |
| <b>Melanoma of the Skin</b>                               | 0.3 | 0.4  | 0.7 | 1.0  | 1.0  | 1.4  | 2.1  | 1.8  | 3.9   | 2.2  | 5.3   | 3.3   | 6.4   | 5.0   |
| <b>Other Non-Epithelial Skin</b>                          | 0.3 | 0.3  | 0.5 | 0.6  | 0.7  | 0.7  | 1.0  | 0.9  | 1.7   | 1.3  | 4.2   | 1.8   | 6.9   | 4.7   |
| <b>Urinary Bladder</b>                                    | 0.2 | 0.1  | 0.9 | 0.3  | 3.4  | 0.9  | 12.9 | 3.2  | 37.0  | 9.8  | 81.7  | 19.5  | 129.4 | 35.5  |
| <b>Kidney and Renal Pelvis</b>                            | 0.3 | 0.4  | 2.3 | 1.3  | 7.5  | 3.4  | 17.6 | 7.6  | 34.9  | 13.7 | 41.3  | 21.2  | 40.7  | 22.7  |
| <b>Ureter</b>                                             | 0.0 | 0.0  | 0.0 | 0.0  | 0.1  | 0.0  | 0.3  | 0.1  | 1.5   | 0.9  | 3.9   | 2.4   | 5.1   | 3.8   |
| <b>Other Urinary Organs</b>                               | 0.0 | 0.0  | 0.0 | 0.0  | 0    | 0.0  | 0.2  | 0.1  | 0.6   | 0.4  | 1.2   | 0.6   | 2.2   | 1.0   |
| <b>Eye and Orbit</b>                                      | 0.0 | 0.1  | 0.1 | 0.1  | 0.2  | 0.1  | 0.3  | 0.3  | 0.6   | 0.3  | 0.8   | 0.3   | 0.9   | 0.5   |
| <b>Brain</b>                                              | 1.6 | 1.4  | 2.6 | 1.7  | 2.9  | 2.1  | 4.6  | 3.1  | 6.6   | 4.8  | 9.8   | 6.2   | 11.5  | 8.9   |
| <b>Cranial Nerves Other Nervous System</b>                | 0.2 | 0.1  | 0.1 | 0.2  | 0.3  | 0.3  | 0.3  | 0.4  | 0.4   | 0.6  | 0.7   | 0.7   | 1.3   | 0.9   |
| <b>Thyroid</b>                                            | 2.1 | 11.1 | 4.8 | 21.7 | 7.1  | 26.2 | 8.8  | 28.9 | 11.4  | 26.3 | 10.0  | 22.2  | 9.8   | 14.1  |
| <b>Other Endocrine Including Thymus</b>                   | 0.3 | 0.3  | 0.6 | 0.3  | 0.9  | 0.7  | 1.2  | 1.1  | 2.1   | 1.6  | 2.5   | 1.8   | 2.5   | 1.9   |
| <b>Hodgkin Lymphoma</b>                                   | 2.3 | 2.4  | 1.3 | 1.4  | 1.0  | 0.8  | 1.1  | 0.7  | 1.4   | 0.7  | 2.3   | 1.3   | 2.6   | 1.4   |
| <b>Non-Hodgkin Lymphoma</b>                               | 3.0 | 2.2  | 5.1 | 3.8  | 10.0 | 6.8  | 19.8 | 14.6 | 42.4  | 26.7 | 67.5  | 48.4  | 90.9  | 63.2  |
| <b>Myeloma</b>                                            | 0.1 | 0.0  | 0.5 | 0.2  | 1.5  | 1.3  | 5.8  | 4.1  | 13.4  | 8.7  | 24.0  | 17.1  | 26.7  | 18.3  |
| <b>Lymphocytic Leukemia</b>                               | 0.9 | 0.6  | 0.9 | 0.5  | 1.5  | 0.9  | 3.2  | 1.7  | 6.2   | 3.3  | 9.1   | 5.1   | 11.2  | 6.0   |

|                                       |     |     |     |     |     |     |     |     |      |     |      |      |      |      |
|---------------------------------------|-----|-----|-----|-----|-----|-----|-----|-----|------|-----|------|------|------|------|
| <b>Myeloid and Monocytic Leukemia</b> | 1.9 | 1.4 | 2.6 | 1.9 | 3.8 | 2.7 | 5.3 | 4.2 | 11.0 | 6.8 | 22.2 | 11.5 | 30.7 | 18.7 |
| <b>Other Leukemia</b>                 | 0.1 | 0.0 | 0.2 | 0.2 | 0.2 | 0.1 | 0.4 | 0.3 | 1.1  | 0.7 | 2.5  | 1.7  | 5.7  | 4.0  |
| <b>Mesothelioma</b>                   | 0.0 | 0.0 | 0.0 | 0.1 | 0.1 | 0.1 | 0.4 | 0.2 | 1.5  | 0.4 | 3.3  | 1.0  | 4.5  | 0.7  |
| <b>Kaposi Sarcoma</b>                 | 0.3 | 0.0 | 1.5 | 0.0 | 1.5 | 0.0 | 0.5 | 0.0 | 0.5  | 0.0 | 0.5  | 0.1  | 1.0  | 0.3  |



**Table S7. Male and female incidence rates per 100,000 by 10-year age groups among Latino individuals, SEER 2000-2019.**

|                                           | 20–29 years      |                    | 30–39 years      |                    | 40–49 years      |                    | 50–59 years      |                    | 60–69 years      |                    | 70–79 years      |                    | 80+ years        |                    |
|-------------------------------------------|------------------|--------------------|------------------|--------------------|------------------|--------------------|------------------|--------------------|------------------|--------------------|------------------|--------------------|------------------|--------------------|
| <b>Cancer Site</b>                        | <b>Male rate</b> | <b>Female rate</b> |
| <b>Lip</b>                                | 0.0              | 0.0                | 0.2              | 0.0                | 0.3              | 0.1                | 0.8              | 0.2                | 1.9              | 0.3                | 2.7              | 0.9                | 4.9              | 1.4                |
| <b>Tongue</b>                             | 0.1              | 0.1                | 0.3              | 0.3                | 1.2              | 0.9                | 4.4              | 1.5                | 7.6              | 3.1                | 8.8              | 3.7                | 7.4              | 5.3                |
| <b>Salivary Gland</b>                     | 0.2              | 0.3                | 0.4              | 0.4                | 0.7              | 0.8                | 1.1              | 1.1                | 2.3              | 1.6                | 4.2              | 2.5                | 6.8              | 3.0                |
| <b>Floor of Mouth</b>                     | 0.0              | 0.0                | 0.0              | 0.0                | 0.3              | 0.0                | 0.9              | 0.3                | 2.1              | 0.4                | 1.9              | 0.9                | 2.1              | 1.0                |
| <b>Gum and Other Mouth</b>                | 0.1              | 0.1                | 0.2              | 0.2                | 0.6              | 0.3                | 1.6              | 0.8                | 3.4              | 1.7                | 4.5              | 3.7                | 4.9              | 5.7                |
| <b>Nasopharynx</b>                        | 0.1              | 0.1                | 0.2              | 0.2                | 0.5              | 0.2                | 1.0              | 0.4                | 1.3              | 0.6                | 1.7              | 0.7                | 1.2              | 0.8                |
| <b>Tonsil</b>                             | 0.0              | 0.0                | 0.1              | 0.0                | 1.4              | 0.2                | 4.1              | 0.9                | 6.0              | 1.1                | 5.6              | 1.4                | 3.1              | 0.9                |
| <b>Oropharynx</b>                         | 0.0              | 0.0                | 0.0              | 0.0                | 0.1              | 0.0                | 0.8              | 0.2                | 1.6              | 0.2                | 1.5              | 0.5                | 1.6              | 0.2                |
| <b>Hypopharynx</b>                        | 0.0              | 0.0                | 0.0              | 0.0                | 0.4              | 0.0                | 1.3              | 0.2                | 3.1              | 0.4                | 4.5              | 0.5                | 3.6              | 0.4                |
| <b>Other Oral Cavity and Pharynx</b>      | 0.0              | 0.0                | 0.0              | 0.0                | 0.1              | 0.0                | 0.3              | 0.1                | 0.6              | 0.1                | 0.8              | 0.2                | 1.2              | 0.4                |
| <b>Esophagus</b>                          | 0.0              | 0.0                | 0.3              | 0.1                | 1.7              | 0.3                | 6.1              | 0.8                | 15.0             | 2.5                | 24.7             | 4.7                | 29.3             | 9.3                |
| <b>Stomach</b>                            | 0.4              | 0.5                | 2.5              | 2.5                | 6.5              | 6.0                | 16.5             | 11.3               | 37.6             | 20.9               | 72.4             | 40.3               | 97.7             | 61.0               |
| <b>Small Intestine</b>                    | 0.1              | 0.1                | 0.3              | 0.3                | 1.0              | 0.8                | 2.2              | 1.8                | 4.4              | 3.4                | 6.3              | 6.0                | 8.2              | 5.5                |
| <b>Colon and Rectum</b>                   | 1.2              | 1.4                | 5.2              | 5.0                | 17.3             | 15.7               | 58.8             | 43.8               | 122.7            | 77.8               | 187.3            | 128.0              | 228.9            | 192.5              |
| <b>Anus, Anal Canal, and Anorectum</b>    | 0.0              | 0.0                | 0.3              | 0.1                | 1.0              | 0.7                | 1.7              | 2.3                | 2.2              | 3.9                | 2.7              | 4.8                | 3.1              | 6.8                |
| <b>Liver</b>                              | 0.2              | 0.2                | 0.7              | 0.4                | 6.9              | 1.6                | 34.8             | 7.5                | 65.6             | 21.3               | 74.7             | 39.8               | 71.8             | 42.8               |
| <b>Gallbladder</b>                        | 0.0              | 0.0                | 0.1              | 0.2                | 0.4              | 1.5                | 1.1              | 3.9                | 3.4              | 9.6                | 6.6              | 16.1               | 9.7              | 19.8               |
| <b>Other Biliary</b>                      | 0.0              | 0.0                | 0.2              | 0.2                | 0.9              | 0.6                | 2.9              | 2.4                | 7.5              | 6.1                | 14.9             | 10.3               | 19.0             | 17.3               |
| <b>Pancreas</b>                           | 0.1              | 0.2                | 0.7              | 0.6                | 3.4              | 2.8                | 12.1             | 9.3                | 33.6             | 26.4               | 59.1             | 52.2               | 72.4             | 82.1               |
| <b>Retroperitoneum</b>                    | 0.1              | 0.0                | 0.1              | 0.1                | 0.3              | 0.3                | 0.6              | 0.8                | 1.1              | 0.8                | 1.6              | 1.1                | 1.4              | 0.9                |
| <b>Peritoneum, Omentum, and Mesentery</b> | 0.0              | 0.0                | 0.0              | 0.1                | 0.1              | 0.3                | 0.1              | 1.1                | 0.2              | 2.9                | 0.7              | 4.3                | 0.4              | 2.9                |
| <b>Other Digestive Organs</b>             | 0.0              | 0.0                | 0.1              | 0.1                | 0.3              | 0.3                | 0.8              | 0.6                | 1.7              | 1.7                | 3.6              | 3.0                | 6.1              | 6.7                |

|                                                           |     |      |     |      |      |      |      |      |      |      |       |       |       |       |
|-----------------------------------------------------------|-----|------|-----|------|------|------|------|------|------|------|-------|-------|-------|-------|
| <b>Nose, Nasal Cavity, and Middle Ear</b>                 | 0.1 | 0.1  | 0.2 | 0.2  | 0.6  | 0.3  | 1.0  | 0.7  | 1.8  | 1.2  | 2.7   | 1.5   | 3.0   | 2.5   |
| <b>Larynx</b>                                             | 0.0 | 0.0  | 0.2 | 0.1  | 1.4  | 0.3  | 5.8  | 0.8  | 14.2 | 1.7  | 24.3  | 2.9   | 20.1  | 2.2   |
| <b>Lung Bronchus</b>                                      | 0.3 | 0.4  | 1.2 | 1.2  | 5.7  | 5.8  | 26.6 | 21.3 | 97.6 | 63.2 | 216.9 | 129.9 | 271.6 | 151.6 |
| <b>Pleura</b>                                             | 0.0 | 0.0  | 0.0 | 0.0  | 0.0  | 0.0  | 0.0  | 0.0  | 0.1  | 0.0  | 0.3   | 0.1   | 0.6   | 0.1   |
| <b>Trachea, Mediastinum, and Other Respiratory Organs</b> | 0.5 | 0.0  | 0.3 | 0.0  | 0.2  | 0.1  | 0.1  | 0.0  | 0.3  | 0.2  | 0.4   | 0.3   | 0.1   | 0.2   |
| <b>Soft Tissue Including Heart</b>                        | 0.9 | 0.5  | 0.6 | 0.5  | 0.7  | 0.6  | 0.9  | 0.7  | 1.0  | 0.9  | 1.7   | 1.0   | 1.6   | 1.5   |
| <b>Skin Excluding Basal and Squamous</b>                  | 1.2 | 1.2  | 1.9 | 1.7  | 2.4  | 2.3  | 4.2  | 3.3  | 6.4  | 4.7  | 10.7  | 6.8   | 11.2  | 8.1   |
| <b>Melanoma of the Skin</b>                               | 0.5 | 1.3  | 1.4 | 3.3  | 3.0  | 4.9  | 5.8  | 7.1  | 11.4 | 9.7  | 16.6  | 12.6  | 22.1  | 14.7  |
| <b>Other Non-Epithelial Skin</b>                          | 0.3 | 0.4  | 0.6 | 0.6  | 0.8  | 0.8  | 1.1  | 1.0  | 1.9  | 1.9  | 4.4   | 3.4   | 7.9   | 5.2   |
| <b>Urinary Bladder</b>                                    | 0.2 | 0.2  | 0.9 | 0.5  | 3.2  | 1.2  | 13.0 | 3.7  | 42.2 | 11.8 | 89.8  | 23.8  | 144.8 | 41.1  |
| <b>Kidney and Renal Pelvis</b>                            | 0.5 | 0.5  | 3.1 | 2.7  | 11.8 | 7.5  | 28.0 | 16.6 | 56.6 | 30.4 | 70.3  | 39.9  | 63.8  | 39.3  |
| <b>Ureter</b>                                             | 0.0 | 0.0  | 0.0 | 0.0  | 0.0  | 0.0  | 0.2  | 0.1  | 0.9  | 0.4  | 2.1   | 1.2   | 3.3   | 2.3   |
| <b>Other Urinary Organs</b>                               | 0.0 | 0.0  | 0.0 | 0.0  | 0.1  | 0.0  | 0.2  | 0.1  | 0.7  | 0.3  | 1.4   | 0.5   | 2.9   | 1.1   |
| <b>Eye and Orbit</b>                                      | 0.1 | 0.1  | 0.2 | 0.1  | 0.3  | 0.2  | 0.6  | 0.6  | 1.3  | 1.0  | 2.2   | 1.2   | 2.8   | 1.6   |
| <b>Brain</b>                                              | 1.7 | 1.5  | 2.6 | 2.3  | 4.2  | 3.0  | 6.8  | 5.2  | 11.6 | 8.3  | 17.4  | 12.1  | 16.3  | 13.7  |
| <b>Cranial Nerves Other Nervous System</b>                | 0.2 | 0.1  | 0.3 | 0.2  | 0.4  | 0.3  | 0.5  | 0.4  | 0.3  | 0.6  | 0.8   | 0.9   | 0.8   | 0.7   |
| <b>Thyroid</b>                                            | 1.6 | 10.5 | 3.2 | 18.4 | 5.1  | 24.1 | 7.7  | 26.6 | 9.1  | 25.7 | 9.7   | 23.1  | 8.1   | 13.4  |
| <b>Other Endocrine Including Thymus</b>                   | 0.2 | 0.2  | 0.3 | 0.2  | 0.4  | 0.4  | 0.7  | 0.8  | 1.3  | 1.2  | 2.1   | 1.2   | 1.8   | 1.1   |
| <b>Hodgkin Lymphoma</b>                                   | 2.4 | 2.6  | 2.2 | 1.9  | 2.3  | 1.3  | 3.1  | 1.8  | 4.1  | 2.8  | 7.2   | 3.8   | 5.5   | 3.5   |
| <b>Non-Hodgkin Lymphoma</b>                               | 3.2 | 1.9  | 6.8 | 4.0  | 12.9 | 8.3  | 24.8 | 19.0 | 47.4 | 38.0 | 78.3  | 64.7  | 92.2  | 76.9  |
| <b>Myeloma</b>                                            | 0.1 | 0.1  | 0.7 | 0.4  | 2.7  | 2.0  | 8.4  | 6.3  | 20.0 | 14.8 | 34.4  | 24.9  | 41.3  | 26.5  |
| <b>Lymphocytic Leukemia</b>                               | 1.8 | 1.0  | 1.6 | 1.0  | 2.3  | 1.5  | 4.7  | 3.4  | 10.2 | 7.2  | 17.8  | 10.6  | 24.1  | 13.7  |

|                                       |     |     |     |     |     |     |     |     |      |     |      |      |      |      |
|---------------------------------------|-----|-----|-----|-----|-----|-----|-----|-----|------|-----|------|------|------|------|
| <b>Myeloid and Monocytic Leukemia</b> | 1.9 | 1.4 | 2.6 | 1.9 | 3.6 | 3.0 | 5.7 | 4.6 | 10.9 | 8.0 | 20.8 | 13.6 | 32.1 | 18.7 |
| <b>Other Leukemia</b>                 | 0.2 | 0.1 | 0.2 | 0.1 | 0.2 | 0.2 | 0.6 | 0.4 | 1.0  | 0.7 | 3.2  | 1.8  | 5.9  | 4.8  |
| <b>Mesothelioma</b>                   | 0.0 | 0.0 | 0.1 | 0.1 | 0.4 | 0.3 | 1.1 | 0.4 | 3.6  | 0.9 | 9.4  | 2.6  | 14.6 | 3.2  |
| <b>Kaposi Sarcoma</b>                 | 1.7 | 0.0 | 6.0 | 0.1 | 4.3 | 0.1 | 2.5 | 0.1 | 1.7  | 0.3 | 2.8  | 1.0  | 4.5  | 2.3  |

**Table S8. Male and female incidence rates per 100,000 by 10-year age groups among American Indian/Alaska Native individuals, SEER 2000-2019.**

|                                    | 20–29 years |             | 30–39 years |             | 40–49 years |             | 50–59 years |             | 60–69 years |             | 70–79 years |             | 80+ years |             |
|------------------------------------|-------------|-------------|-------------|-------------|-------------|-------------|-------------|-------------|-------------|-------------|-------------|-------------|-----------|-------------|
| Cancer Site                        | Male rate   | Female rate | Male rate | Female rate |
| Lip                                | 0.0         | 0.0         | 0.0         | 0.0         | 0.5         | 0.3         | 0.8         | 0.0         | 3.3         | 0.3         | 3.9         | 0.6         | 6.9       | 2.2         |
| Tongue                             | 0.0         | 0.1         | 0.4         | 0.0         | 2.7         | 0.9         | 4.9         | 3.1         | 10.0        | 3.3         | 8.9         | 2.8         | 2.1       | 2.2         |
| Salivary Gland                     | 0.3         | 1.0         | 1.2         | 1.2         | 1.0         | 1.3         | 1.0         | 2.2         | 1.8         | 1.5         | 3.7         | 2.3         | 7.6       | 1.1         |
| Floor of Mouth                     | 0.0         | 0.0         | 0.0         | 0.1         | 0.6         | 0.3         | 2.0         | 1.6         | 5.4         | 0.3         | 2.8         | 1.1         | 3.8       | 0.0         |
| Gum and Other Mouth                | 0.1         | 0.0         | 0.6         | 0.1         | 0.6         | 0.3         | 3.3         | 0.5         | 4.2         | 3.5         | 3.7         | 3.8         | 5.2       | 5.6         |
| Nasopharynx                        | 0.4         | 0.1         | 1.9         | 0.4         | 3.3         | 0.6         | 6.0         | 2.6         | 10.9        | 5.6         | 10.0        | 4.7         | 9.4       | 3.4         |
| Tonsil                             | 0.0         | 0.0         | 0.3         | 0.0         | 1.4         | 0.3         | 5.4         | 1.1         | 7.7         | 1.2         | 3.7         | 0.6         | 2.1       | 1.1         |
| Oropharynx                         | 0.0         | 0.0         | 0.0         | 0.0         | 0.6         | 0.1         | 1.4         | 0.6         | 1.9         | 0.3         | 1.3         | 0.5         | 1.7       | 1.1         |
| Hypopharynx                        | 0.0         | 0.0         | 0.0         | 0.0         | 0.2         | 0.1         | 2.7         | 1.3         | 6.3         | 0.6         | 8.3         | 1.0         | 7.6       | 0.0         |
| Other Oral Cavity and Pharynx      | 0.0         | 0.0         | 0.0         | 0.0         | 0.2         | 0.1         | 1.1         | 0.2         | 1.0         | 0.3         | 0.0         | 0.0         | 3.8       | 1.1         |
| Esophagus                          | 0.1         | 0.0         | 0.2         | 0.1         | 2.7         | 0.9         | 11.3        | 3.5         | 23.1        | 6.1         | 34.0        | 10.6        | 50.2      | 14.5        |
| Stomach                            | 0.4         | 0.9         | 4.7         | 5.8         | 10.7        | 5.3         | 24.0        | 13.5        | 51.3        | 25.5        | 92.2        | 41.1        | 114.9     | 65.0        |
| Small Intestine                    | 0.1         | 0.1         | 0.3         | 0.4         | 0.5         | 1.5         | 2.0         | 1.9         | 7.7         | 3.2         | 7.4         | 4.0         | 5.5       | 4.5         |
| Colon and Rectum                   | 2.3         | 2.5         | 11.3        | 10.3        | 31.3        | 31.2        | 89.1        | 72.1        | 172.8       | 126.4       | 242.2       | 225.5       | 292.6     | 254.2       |
| Anus, Anal Canal, and Anorectum    | 0.0         | 0.0         | 0.2         | 0.4         | 1.4         | 1.6         | 2.5         | 2.5         | 4.7         | 3.9         | 0.9         | 3.1         | 3.8       | 6.7         |
| Liver                              | 0.6         | 0.4         | 1.5         | 1.1         | 7.1         | 4.0         | 42.0        | 13.0        | 67.5        | 30.4        | 75.9        | 50.1        | 97.3      | 61.6        |
| Gallbladder                        | 0.0         | 0.1         | 0.0         | 0.2         | 0.6         | 1.5         | 1.7         | 6.1         | 9.8         | 12.9        | 17.9        | 23.7        | 30.2      | 39.2        |
| Other Biliary                      | 0.0         | 0.0         | 0.0         | 0.1         | 1.4         | 0.4         | 2.4         | 2.4         | 10.9        | 6.8         | 18.5        | 18.7        | 21.2      | 23.5        |
| Pancreas                           | 0.1         | 0.0         | 0.4         | 0.8         | 5.4         | 3.4         | 17.3        | 15.5        | 44.0        | 26.2        | 67.6        | 51.1        | 85.1      | 87.4        |
| Retroperitoneum                    | 0.1         | 0.1         | 0.2         | 0.1         | 0.2         | 0.0         | 0.4         | 0.7         | 0.0         | 1.2         | 0.7         | 0.6         | 0.0       | 0.0         |
| Peritoneum, Omentum, and Mesentery | 0.0         | 0.0         | 0.0         | 0.1         | 0.0         | 0.1         | 0.2         | 0.4         | 0.4         | 2.7         | 0.0         | 1.1         | 0.0       | 2.2         |
| Other Digestive Organs             | 0.0         | 0.0         | 0.2         | 0.0         | 0.6         | 0.3         | 2.1         | 1.6         | 4.1         | 4.0         | 5.2         | 6.9         | 11.8      | 12.3        |

|                                                           |     |      |     |      |      |      |      |      |       |       |       |       |       |       |
|-----------------------------------------------------------|-----|------|-----|------|------|------|------|------|-------|-------|-------|-------|-------|-------|
| <b>Nose, Nasal Cavity, and Middle Ear</b>                 | 0.2 | 0.0  | 0.5 | 0.3  | 0.6  | 0.9  | 0.8  | 0.8  | 2.1   | 0.9   | 3.1   | 2.8   | 10.7  | 7.8   |
| <b>Larynx</b>                                             | 0.0 | 0.0  | 0.0 | 0.0  | 2.1  | 0.4  | 8.7  | 1.1  | 14.1  | 3.8   | 22.7  | 2.0   | 13.2  | 2.2   |
| <b>Lung Bronchus</b>                                      | 0.5 | 0.2  | 2.0 | 0.7  | 11.6 | 10.0 | 60.5 | 44.5 | 175.9 | 121.7 | 370.3 | 214.5 | 361.5 | 207.4 |
| <b>Pleura</b>                                             | 0.0 | 0.0  | 0.0 | 0.0  | 0.0  | 0.0  | 0.0  | 0.0  | 0.6   | 0.0   | 0.0   | 0.0   | 0.0   | 0.0   |
| <b>Trachea, Mediastinum, and Other Respiratory Organs</b> | 0.2 | 0.0  | 0.0 | 0.0  | 0.2  | 0.0  | 0.2  | 0.0  | 0.4   | 0.0   | 0.7   | 0.0   | 1.7   | 0.0   |
| <b>Soft Tissue Including Heart</b>                        | 0.7 | 1.0  | 0.8 | 0.7  | 0.9  | 0.7  | 0.4  | 1.1  | 0.7   | 1.1   | 2.0   | 2.0   | 1.7   | 2.2   |
| <b>Skin Excluding Basal and Squamous</b>                  | 2.3 | 1.4  | 2.4 | 1.4  | 3.2  | 2.2  | 3.5  | 4.5  | 5.8   | 2.6   | 9.6   | 7.4   | 13.9  | 9.0   |
| <b>Melanoma of the Skin</b>                               | 0.1 | 2.7  | 2.9 | 4.0  | 2.9  | 5.1  | 6.6  | 5.1  | 10.5  | 9.6   | 17.2  | 10.0  | 21.4  | 21.3  |
| <b>Other Non-Epithelial Skin</b>                          | 0.1 | 1.0  | 0.7 | 1.1  | 1.0  | 0.9  | 1.0  | 1.0  | 2.8   | 2.3   | 4.6   | 6.0   | 5.9   | 4.5   |
| <b>Urinary Bladder</b>                                    | 0.3 | 0.6  | 1.9 | 0.1  | 3.6  | 1.6  | 15.7 | 3.9  | 40.4  | 9.2   | 64.3  | 14.3  | 115.4 | 20.2  |
| <b>Kidney and Renal Pelvis</b>                            | 0.8 | 1.0  | 8.0 | 4.4  | 22.1 | 12.4 | 46.5 | 27.2 | 89.5  | 48.0  | 132.1 | 54.2  | 118.3 | 51.6  |
| <b>Ureter</b>                                             | 0.0 | 0.0  | 0.0 | 0.0  | 0.0  | 0.0  | 0.6  | 0.0  | 0.7   | 0.3   | 1.7   | 0.5   | 0.0   | 0.0   |
| <b>Other Urinary Organs</b>                               | 0.0 | 0.0  | 0.0 | 0.0  | 0.0  | 0.0  | 0.2  | 0.0  | 0.7   | 0.3   | 2.4   | 0.0   | 0.0   | 1.1   |
| <b>Eye and Orbit</b>                                      | 0.1 | 0.1  | 0.2 | 0.3  | 0.0  | 0.2  | 0.2  | 0.4  | 0.4   | 0.9   | 1.3   | 1.1   | 3.8   | 3.4   |
| <b>Brain</b>                                              | 2.5 | 1.7  | 3.6 | 2.9  | 3.7  | 2.5  | 4.1  | 3.5  | 9.2   | 4.4   | 14.0  | 5.8   | 14.9  | 5.6   |
| <b>Cranial Nerves Other Nervous System</b>                | 0.3 | 0.4  | 0.3 | 0.3  | 0.0  | 0.7  | 0.8  | 0.2  | 1.0   | 1.0   | 0.0   | 0.0   | 0.0   | 0.0   |
| <b>Thyroid</b>                                            | 1.8 | 12.4 | 3.4 | 22.7 | 4.6  | 21.5 | 6.9  | 24.3 | 12.6  | 20.1  | 8.3   | 20.4  | 5.9   | 19.1  |
| <b>Other Endocrine Including Thymus</b>                   | 0.6 | 0.1  | 0.3 | 0.4  | 0.2  | 0.1  | 0.8  | 0.4  | 1.0   | 1.1   | 1.5   | 0.0   | 0.0   | 0.0   |
| <b>Hodgkin Lymphoma</b>                                   | 1.4 | 1.2  | 1.6 | 1.8  | 1.3  | 0.2  | 1.4  | 0.9  | 2.0   | 1.7   | 0.9   | 4.0   | 3.8   | 3.4   |
| <b>Non-Hodgkin Lymphoma</b>                               | 1.2 | 1.4  | 5.9 | 4.4  | 9.6  | 7.7  | 21.1 | 21.1 | 39.4  | 31.4  | 57.8  | 42.3  | 66.0  | 66.1  |
| <b>Myeloma</b>                                            | 0.3 | 0.1  | 1.2 | 0.6  | 3.7  | 2.6  | 7.7  | 8.6  | 18.7  | 18.1  | 35.8  | 33.6  | 38.5  | 25.8  |
| <b>Lymphocytic Leukemia</b>                               | 1.8 | 1.3  | 1.3 | 1.6  | 0.8  | 0.9  | 6.2  | 4.4  | 8.5   | 4.1   | 13.7  | 6.9   | 16.6  | 7.8   |

|                                       |     |     |     |     |     |     |     |     |      |     |      |      |      |     |
|---------------------------------------|-----|-----|-----|-----|-----|-----|-----|-----|------|-----|------|------|------|-----|
| <b>Myeloid and Monocytic Leukemia</b> | 2.1 | 1.1 | 3.3 | 2.8 | 1.9 | 3.1 | 8.7 | 5.0 | 11.0 | 6.3 | 14.4 | 10.6 | 22.6 | 3.4 |
| <b>Other Leukemia</b>                 | 0.4 | 0.1 | 0.1 | 0.1 | 0.5 | 0.7 | 1.8 | 0.9 | 2.6  | 1.0 | 2.2  | 2.8  | 5.9  | 2.2 |
| <b>Mesothelioma</b>                   | 0.1 | 0.0 | 0.3 | 0.0 | 0.6 | 0.2 | 1.4 | 0.9 | 3.6  | 0.3 | 4.8  | 2.9  | 14.9 | 4.5 |
| <b>Kaposi Sarcoma</b>                 | 1.0 | 0.0 | 2.6 | 0.0 | 2.4 | 0.0 | 1.3 | 0.0 | 1.4  | 0.0 | 2.4  | 1.1  | 3.5  | 3.4 |
